# Supplementary material for: Revealing higher than expected meiofaunal diversity in Antarctic sediments: a metabarcoding approach
Source: PubMed Central journal article supplement (PMC5522477; doi:10.1038/s41598-017-06687-x), 2017-07-21
Supplement: 41598_2017_6687_MOESM1_ESM.pdf [file 41598_2017_6687_MOESM1_ESM.pdf]

**Revealing higher than expected meiofaunal diversity in Antarctic sediments: a metabarcoding approach**

**Supplementary Information**

Fonseca VG<sup>1</sup>, Sinniger F<sup>2</sup>, Gaspar JM<sup>3</sup>, Quince C<sup>4</sup>, Creer S<sup>5</sup>, Deborah M Power<sup>6</sup>, Lloyd S Peck<sup>7</sup>, Melody S Clark<sup>7</sup>

<sup>1</sup>Zoological Research Museum Alexander Koenig (ZFMK), Centre for Molecular Biodiversity Research, Bonn, Germany.

<sup>2</sup>Sesoko Station, Tropical Biosphere Research Center, University of the Ryukyus, 3422 Sesoko, Motobu, Okinawa, 905-0227 Japan.

<sup>3</sup>Computational Biology Institute, George Washington University, Ashburn, Virginia, USA.

<sup>4</sup>Department of Microbiology and Infection, Warwick Medical School, University of Warwick, Coventry, CV4 7AL, UK.

<sup>5</sup>Molecular Ecology and Fisheries Genetics Laboratory, School of Biological Sciences, Bangor University, Gwynedd, LL57 2UW, UK.

<sup>6</sup>Centro de Ciencias do Mar, Universidade do Algarve, Campus de Gambelas, Faro, 8005-139, Portugal

<sup>7</sup>British Antarctic Survey, Natural Environment Research Council, High Cross, Madingley Road, Cambridge, CB3 0ET, UK

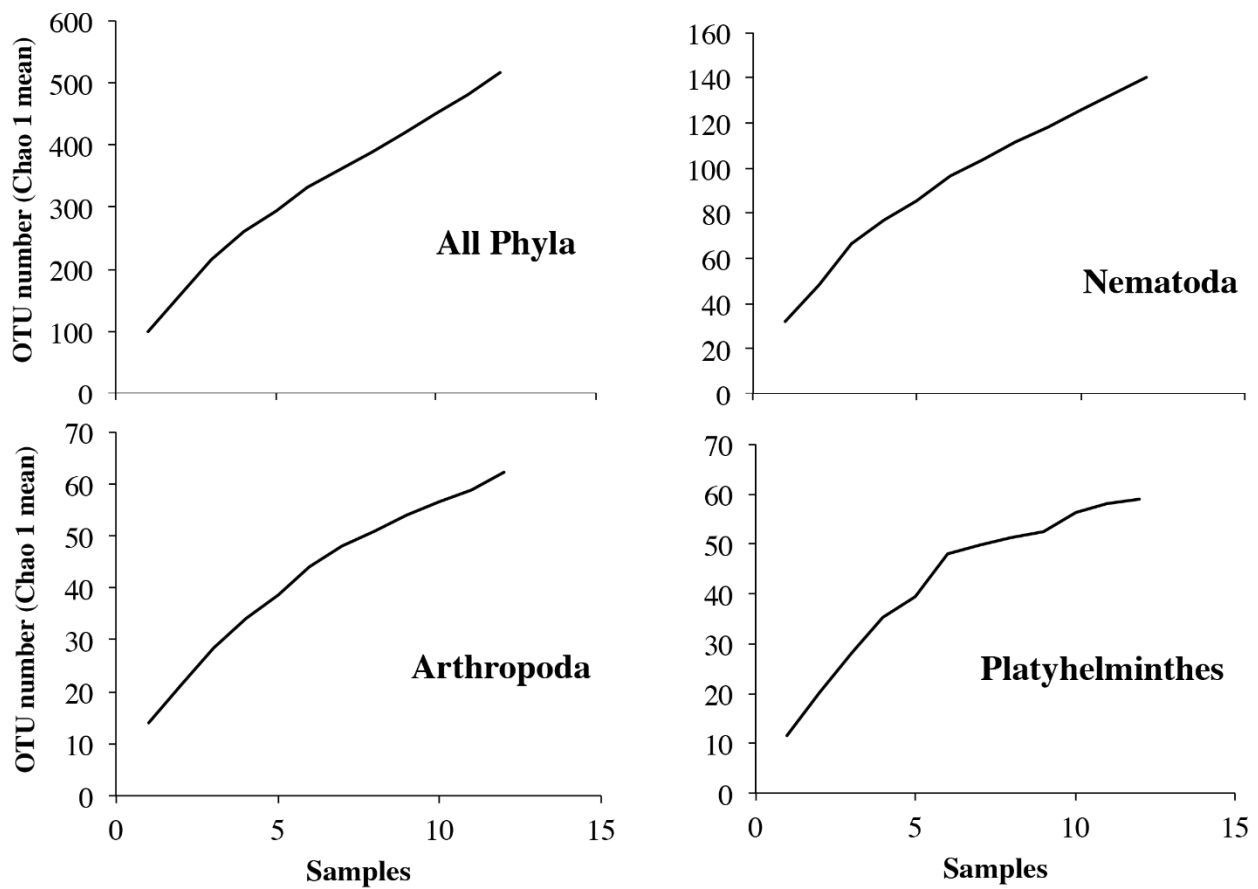

**Supplementary Figure S1:** Rarefaction curves of the Chao 1 diversity estimator. Plots are shown for all phyla, Nematoda, Arthropoda and Platyhelminthes at 97% identity OTU cut-off for all the Antarctic Peninsula sampled sites samples. Curves were estimated from 100 randomizations, without replacement, using EstimateS, version 8.2.0.

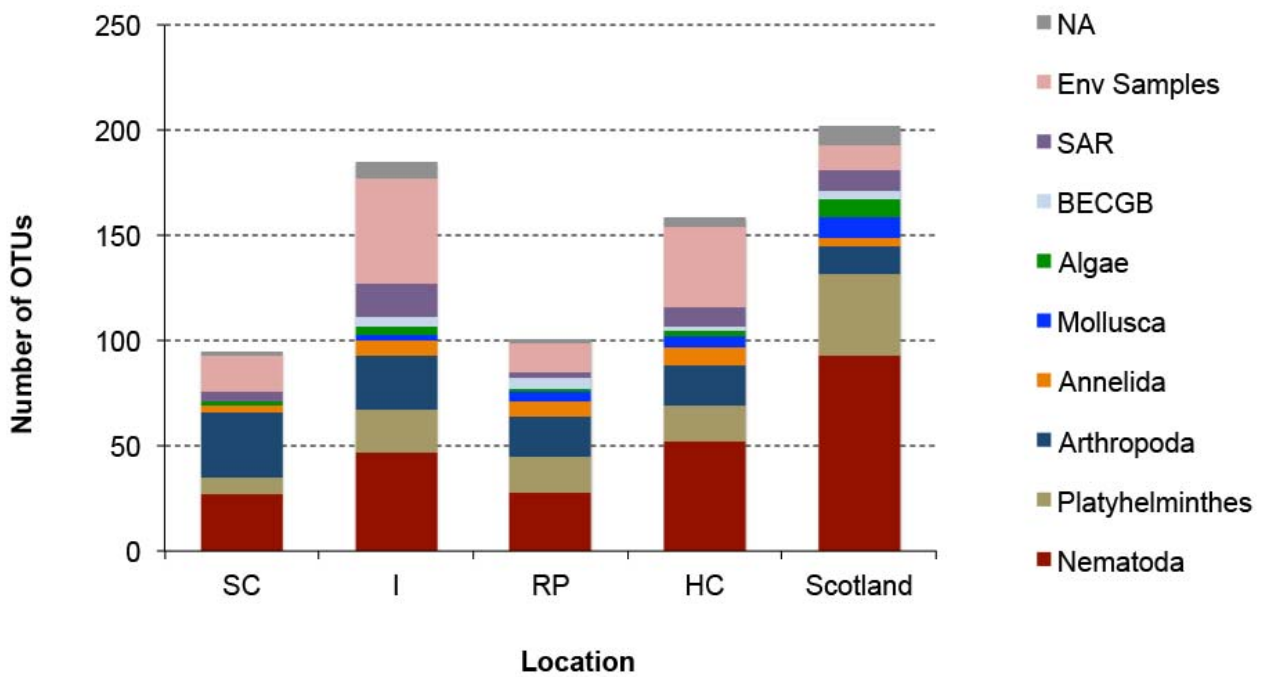

**Supplementary Figure S2:** Community composition for the Antarctic sampled areas Hangar Cove (HC), Rothera Point (RP), Islands (I), South Cove (SC) and also for the Scottish sampled site<sup>26</sup>. Taxonomy assignment was performed using the SILVA database and the number of total OTUs for each sample site is shown (triplicates were merged per sample site).

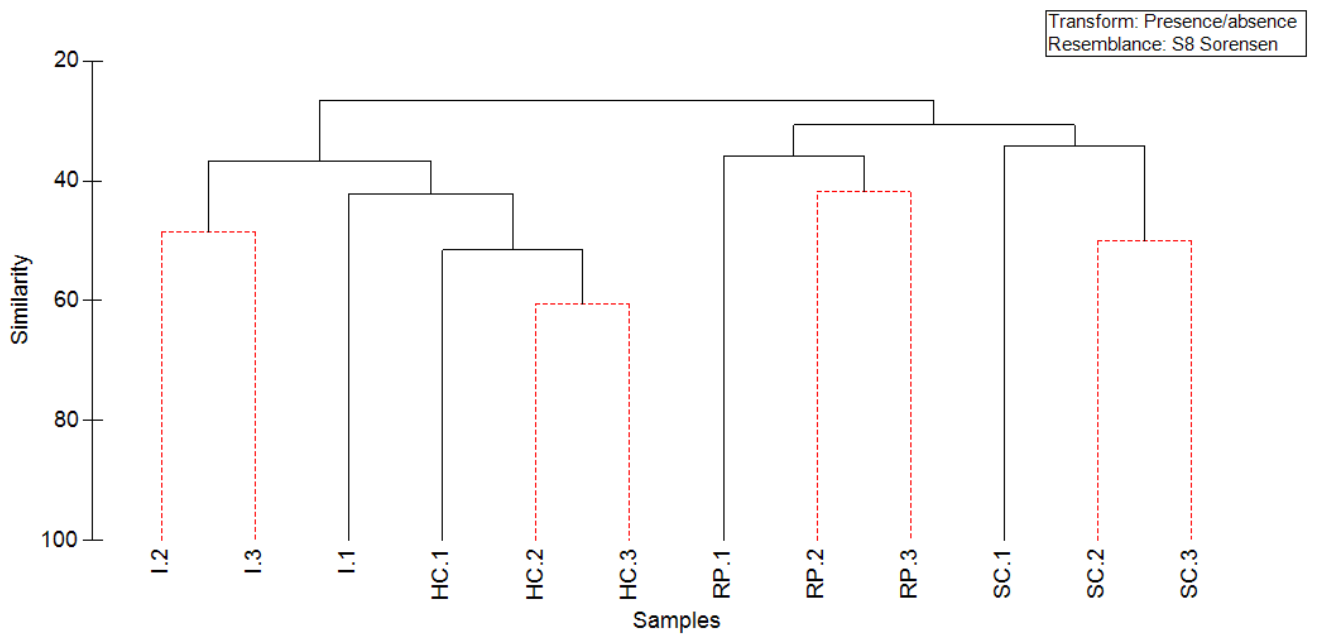

**Supplementary\_Figure\_S3:** Cluster analysis for taxonomic patterns of meiofaunal communities based on Sørensen similarities of OTU presence/absence data for the combined sites. In the dendrogram, black solid lines represent samples sharing a significant similarity profile with a SIMPROF analysis.

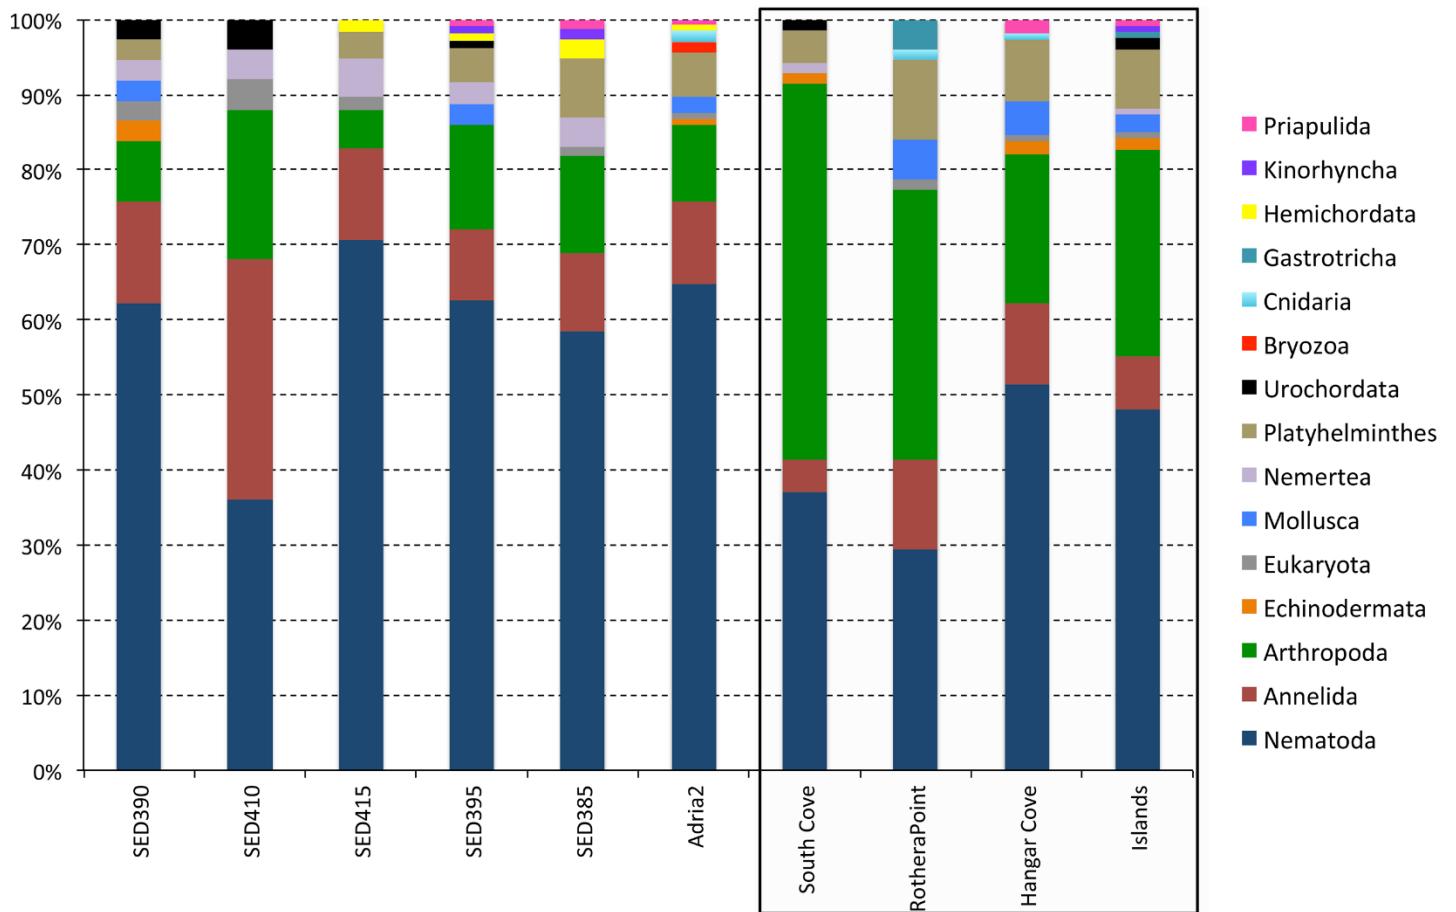

**Supplementary Figure S4:** Community composition for the shallow and deep-water samples. The shallow-water samples are highlighted within a border. Taxonomy assignment was performed using the SILVA database with the percentage of OTUs per phyla shown in all sample sites.

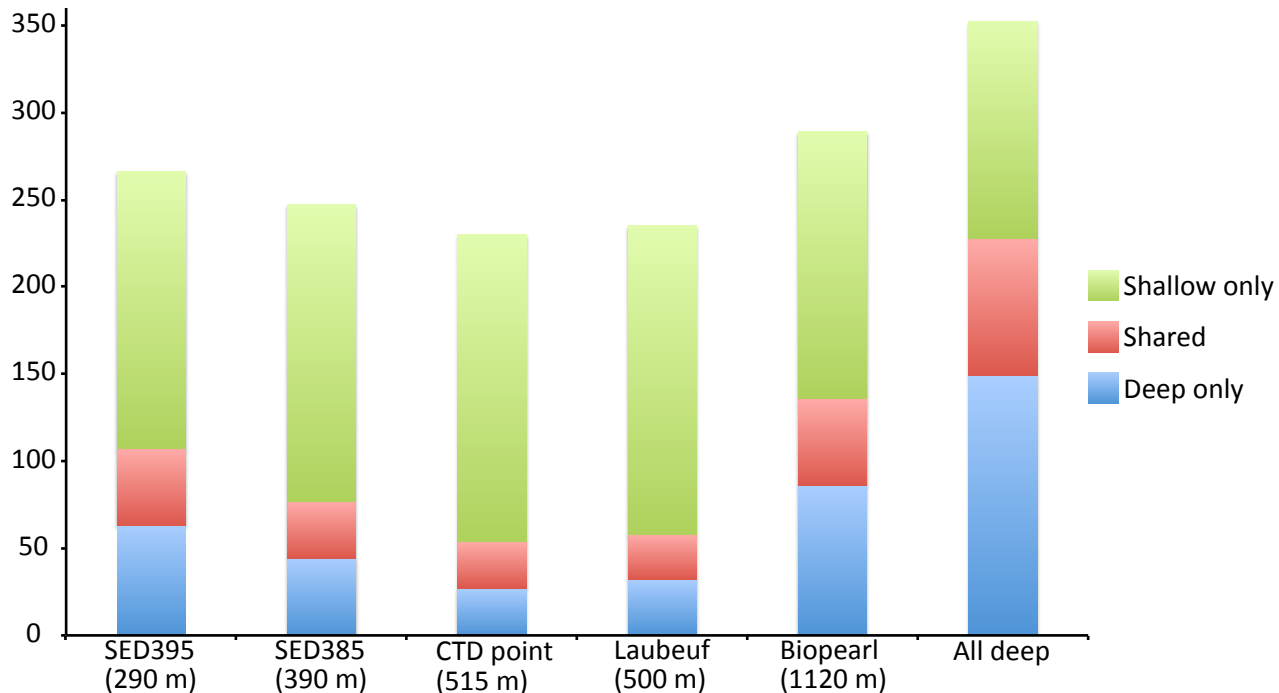

**Supplementary Figure S5:** Overlap of metazoan OTUs between merged shallow samples and deep samples (individual and merged). Values are based on presence/absence data, with a total of 203 distinct metazoan OTUs found in all shallow samples and between 54 and 136 distinct OTUs in each of the deep samples for a total of 228 different deep metazoan OTUs.

Supplementary Material S1:

Fonseca et al. “**Revealing higher than expected meiofaunal diversity in Antarctic sediments: a metabarcoding approach**”

Supplementary analysis

**Method**

All Eukaryotic OTUs retrieved from the data analysis were used to confirm the taxonomic position and community composition within the main eukaryotic metazoan found, using a Neighbour-Joining (NJ) phylogeny reconstruction, 500 bootstrap replications and the Kimura 2-parameter pairwise distance model. The analysis was performed using the software Mega7 (Kumar *et al.*, 2016) and illustrated via a phylogenetic tree produced using the Interactive Tree of Life iTOL tool (Letunic & Bork, 2007).

**Result**

Phylogenetic analysis of the total Eukaryotic OTUs further confirmed the presence of five taxonomically distinct phyla groups, the Nematoda, Arthropoda, Platyhelminthes, Annelida and the SAR supergroup (Starmenopiles, Alveolata and Rhizaria) and all phylogenetic clusters were supported by strong to moderate bootstrap values (Figure S1). OTUs assigned to Fungi were removed from the analysis and the Chloroplastida OTUS (ALGAE) were used as an out-group (Figure S1). The Arthropoda cluster had a strong bootstrap support but it also showed a smaller independent cluster comprised mainly of the Ostracoda class (Figure S1). Here, three Echinodermata OTUs, two Kynorincha OTUs and one Mollusca OTU also sub-clustered. The Mollusca (7 OTUs) and Gastrotricha (4 OTUs) clustered inside the Annelida phyla. Within the SAR supergroup the Rhizaria (Cercozoa) also showed an independent phylogenetic sub-cluster, whereas the Stramenopiles and Alveolata clustered concurrently (Figure S1).

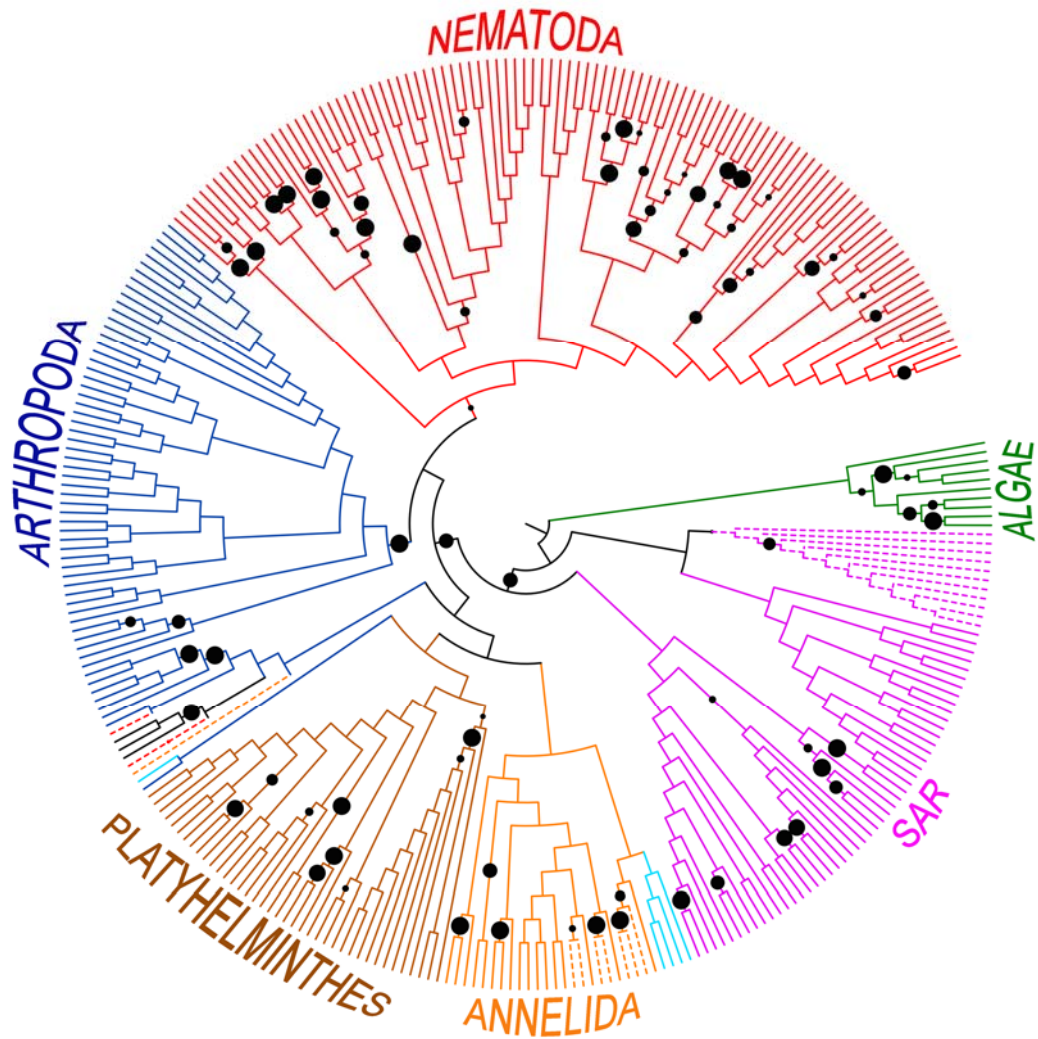

**Figure S1-** Phylogenetic tree of all Eukaryotic OTUs using a Neighbour-Joining analysis based on the Kimura 2-parameter model. Black symbols at nodes represent the corresponding range of bootstrap support values, from the smallest (75% support) to the largest (100% support). Five main distinct phylogenetic groups were formed the Nematoda, Arthropoda, Platyhelminthes, Annelida and the SAR supergroup (Starmenopiles, Alveolata and Rhizaria). The Rhizaria from the SAR supergroup is depicted in dash-purple. Other phyla are also clustered, the Mollusca (dash-orange), Kynorincha (dash-red), Gastrotricha (light blue) and Echinodermata (solid black). The outgroup is the ALGAE green cluster. SILVA database was used for OTU taxonomy classification.



**Supplementary Table S1.1-** Closest BLAST matches of Operational Taxonomic Units (OTUs) retrieved from Rothera sample sites, assigned to Nematoda, up to genus or species levels (Description) using SILVA 1.11 database. Depicted are the public accession numbers (AcNumber), BLAST identity percentage against SILVA (BLAST % ID), Phylum and other Taxa ranking.

| OTU#      | AcNumber       | BLAST % ID | Phylum           | Taxa Rank             | Description                   |
|-----------|----------------|------------|------------------|-----------------------|-------------------------------|
| denovo208 | gb AY593940.1  | 94,5       | phylum: Nematoda | class: Chromadorea    | Achromadora cf terricola      |
| denovo219 | emb AJ966473.1 | 91,17      | phylum: Nematoda | class: Chromadorea    | Anaplectus sp.                |
| denovo150 | gb HM564638.1  | 98,53      | phylum: Nematoda | class: Enoplea        | Anticoma sp.                  |
| denovo169 | gb HM564638.1  | 96,19      | phylum: Nematoda | class: Enoplea        | Anticoma sp.                  |
| denovo46  | gb JN968252.1  | 100        | phylum: Nematoda | class: Enoplea        | Aporcelaimellus sp.           |
| denovo165 | gb KF935309.1  | 96,99      | phylum: Nemertea | class: Enopla         | Argonemertes australiensis    |
| denovo166 | gb FJ040461.1  | 96,03      | phylum: Nematoda | class: Chromadorea    | Axonolaimus sp.               |
| denovo310 | gb FJ040461.1  | 92,36      | phylum: Nematoda | class: Chromadorea    | Axonolaimus sp.               |
| denovo88  | emb AJ966476.1 | 92,68      | phylum: Nematoda | class: Enoplea        | Bathylaimus assimilis         |
| denovo159 | gb AY854218.1  | 94,44      | phylum: Nematoda | class: Chromadorea    | Calomicrolaimus parahonestus  |
| denovo160 | gb AY854218.1  | 94,97      | phylum: Nematoda | class: Chromadorea    | Calomicrolaimus parahonestus  |
| denovo294 | gb AY854218.1  | 98,14      | phylum: Nematoda | class: Chromadorea    | Calomicrolaimus parahonestus  |
| denovo281 | gb JN968284.1  | 90         | phylum: Nematoda | class: Chromadorea    | Calomicrolaimus sp.           |
| denovo336 | gb JX678599.1  | 95,62      | phylum: Nematoda | class: Chromadorea    | Camacolaimus sp.              |
| denovo93  | gb EF591327.1  | 97,94      | phylum: Nematoda | class: Chromadorea    | Camacolaimus sp.              |
| denovo170 | gb HM564544.1  | 98,83      | phylum: Nematoda | class: Enoplea        | Chaetonema sp.                |
| denovo38  | gb JN968217.1  | 91,88      | phylum: Nematoda | class: Chromadorea    | Daptonema sp.                 |
| denovo298 | gb JN968217.1  | 91,91      | phylum: Nematoda | class: Chromadorea    | Daptonema sp.                 |
| denovo304 | gb EF591333.1  | 95,53      | phylum: Nematoda | class: Chromadorea    | Desmolaimus sp.               |
| denovo275 | gb EF591333.1  | 97,63      | phylum: Nematoda | class: Chromadorea    | Desmolaimus sp.               |
| denovo138 | gb EF591333.1  | 95,79      | phylum: Nematoda | class: Chromadorea    | Desmolaimus sp.               |
| denovo65  | gb EF591333.1  | 96,59      | phylum: Nematoda | class: Chromadorea    | Desmolaimus sp.               |
| denovo184 | gb EF591333.1  | 97,63      | phylum: Nematoda | class: Chromadorea    | Desmolaimus sp.               |
| denovo267 | gb EF591333.1  | 94,23      | phylum: Nematoda | class: Chromadorea    | Desmolaimus sp.               |
| denovo75  | gb EF591333.1  | 97,63      | phylum: Nematoda | class: Chromadorea    | Desmolaimus sp.               |
| denovo8   | gb EF591333.1  | 94,74      | phylum: Nematoda | class: Chromadorea    | Desmolaimus sp.               |
| denovo195 | gb EF591333.1  | 94,47      | phylum: Nematoda | class: Chromadorea    | Desmolaimus sp.               |
| denovo178 | gb EF591333.1  | 95,01      | phylum: Nematoda | class: Chromadorea    | Desmolaimus sp.               |
| denovo321 | gb EF591333.1  | 93,79      | phylum: Nematoda | class: Chromadorea    | Desmolaimus sp.               |
| denovo76  | gb FJ182217.1  | 97,63      | phylum: Nematoda | class: Chromadorea    | Draconema japonicum           |
| denovo168 | gb AY854193.1  | 98,66      | phylum: Nematoda | class: Enoplea        | Enoploides brunettii          |
| denovo42  | gb HM564545.1  | 98,49      | phylum: Nematoda | class: Enoplea        | Halalaimus sp.                |
| denovo330 | gb HM564479.1  | 98,5       | phylum: Nematoda | class: Enoplea        | Halalaimus sp.                |
| denovo84  | gb FJ040458.1  | 93,18      | phylum: Nematoda | class: Chromadorea    | Leptolaimus sp.               |
| denovo209 | gb FJ040458.1  | 93,18      | phylum: Nematoda | class: Chromadorea    | Leptolaimus sp.               |
| denovo97  | gb FJ040458.1  | 93,07      | phylum: Nematoda | class: Chromadorea    | Leptolaimus sp.               |
| denovo81  | gb FJ040458.1  | 90,84      | phylum: Nematoda | class: Chromadorea    | Leptolaimus sp.               |
| denovo124 | gb FJ040458.1  | 94         | phylum: Nematoda | class: Chromadorea    | Leptolaimus sp.               |
| denovo149 | gb JF293035.1  | 98,45      | phylum: Nemertea | class: Anopla         | Lineus torquatus              |
| denovo231 | gb EF591337.1  | 92,86      | phylum: Nematoda | class: Chromadorea    | Linhomoeidae sp.              |
| denovo314 | gb JN968218.1  | 93,88      | phylum: Nematoda | class: Chromadorea    | Metadesmolaimus sp.           |
| denovo110 | gb AY854210.1  | 97,89      | phylum: Nematoda | class: Chromadorea    | Neochromadora                 |
| denovo299 | gb AY854210.1  | 97,36      | phylum: Nematoda | class: Chromadorea    | Neochromadora                 |
| denovo328 | gb AY854210.1  | 96,31      | phylum: Nematoda | class: Chromadorea    | Neochromadora                 |
| denovo198 | gb AY854210.1  | 96,57      | phylum: Nematoda | class: Chromadorea    | Neochromadora                 |
| denovo252 | gb AY854210.1  | 98,29      | phylum: Nematoda | class: Chromadorea    | Neochromadora                 |
| denovo133 | gb AY854210.1  | 95,51      | phylum: Nematoda | class: Chromadorea    | Neochromadora                 |
| denovo60  | gb AY854210.1  | 97,63      | phylum: Nematoda | class: Chromadorea    | Neochromadora                 |
| denovo10  | gb AY854210.1  | 95,78      | phylum: Nematoda | class: Chromadorea    | Neochromadora                 |
| denovo193 | gb AY854210.1  | 95,51      | phylum: Nematoda | class: Chromadorea    | Neochromadora                 |
| denovo48  | gb AY854210.1  | 93,95      | phylum: Nematoda | class: Chromadorea    | Neochromadora                 |
| denovo333 | gb JN968246.1  | 94,72      | phylum: Nematoda | class: Chromadorea    | Neochromadora sp.             |
| denovo207 | gb JN968246.1  | 93,14      | phylum: Nematoda | class: Chromadorea    | Neochromadora sp.             |
| denovo78  | gb JN968246.1  | 96,31      | phylum: Nematoda | class: Chromadorea    | Neochromadora sp.             |
| denovo197 | gb JN968246.1  | 92,61      | phylum: Nematoda | class: Chromadorea    | Neochromadora sp.             |
| denovo154 | gb JN968246.1  | 95,78      | phylum: Nematoda | class: Chromadorea    | Neochromadora sp.             |
| denovo194 | gb JN968246.1  | 94,74      | phylum: Nematoda | class: Chromadorea    | Neochromadora sp.             |
| denovo261 | gb JN968246.1  | 93,44      | phylum: Nematoda | class: Chromadorea    | Neochromadora sp.             |
| denovo25  | gb JN968215.1  | 95,25      | phylum: Nematoda | class: Chromadorea    | Neochromadora sp.             |
| denovo96  | gb JN968215.1  | 91,6       | phylum: Nematoda | class: Chromadorea    | Neochromadora sp.             |
| denovo66  | gb FJ040459.1  | 97,6       | phylum: Nematoda | class: Chromadorea    | Odontophora sp.               |
| denovo139 | gb FJ040459.1  | 94,43      | phylum: Nematoda | class: Chromadorea    | Odontophora sp.               |
| denovo289 | gb AY854196.1  | 96,32      | phylum: Nematoda | class: Enoplea        | Odontophora sp.               |
| denovo300 | gb FJ040499.1  | 96,55      | phylum: Nematoda | class: Enoplea        | Oxystomina sp.                |
| denovo277 | gb FJ040499.1  | 95,78      | phylum: Nematoda | class: Enoplea        | Oxystomina sp.                |
| denovo274 | gb FJ040499.1  | 96,55      | phylum: Nematoda | class: Enoplea        | Oxystomina sp.                |
| denovo57  | gb KJ638035.1  | 95,89      | phylum: Nematoda | class: Chromadorea    | Paracanthochus sp.            |
| denovo258 | gb KF591743.1  | 92,73      | phylum: Nematoda | class: Chromadorea    | Pomponema sp.                 |
| denovo0   | gb JF293023.1  | 98,73      | phylum: Nemertea | class: Enopla         | Prosorhochmus americanus      |
| denovo316 | gb JN968227.1  | 90,81      | phylum: Nematoda | class: Chromadorea    | Punctodora ratzeburgensis     |
| denovo117 | gb JN968228.1  | 98,43      | phylum: Nematoda | class: Chromadorea    | Sabatieria pulchra            |
| denovo19  | gb JN968228.1  | 91,95      | phylum: Nematoda | class: Chromadorea    | Sabatieria pulchra            |
| denovo141 | gb JN968228.1  | 97,45      | phylum: Nematoda | class: Chromadorea    | Sabatieria pulchra            |
| denovo183 | gb JN968221.1  | 97,97      | phylum: Nematoda | class: Chromadorea    | Sabatieria sp.                |
| denovo43  | gb JN968221.1  | 92,15      | phylum: Nematoda | class: Chromadorea    | Sabatieria sp.                |
| denovo101 | gb JN968221.1  | 97,38      | phylum: Nematoda | class: Chromadorea    | Sabatieria sp.                |
| denovo113 | gb JN968221.1  | 94,5       | phylum: Nematoda | class: Chromadorea    | Sabatieria sp.                |
| denovo68  | gb EF591321.1  | 95,26      | phylum: Nematoda | class: Chromadorea    | Setostephanolaimus spartinae  |
| denovo29  | gb JN968264.1  | 95,36      | phylum: Nematoda | class: Chromadorea    | Sphaerolaimus hirsutus        |
| denovo180 | gb JN968239.1  | 91,6       | phylum: Nematoda | class: Chromadorea    | Sphaerolaimus hirsutus        |
| denovo21  | gb JN968216.1  | 99,44      | phylum: Nematoda | class: Chromadorea    | Spirinia parasitifera         |
| denovo31  | gb JN968216.1  | 95,24      | phylum: Nematoda | class: Chromadorea    | Spirinia parasitifera isolate |
| denovo54  | gb FJ040468.1  | 97,87      | phylum: Nematoda | class: Chromadorea    | Synonchiella sp.              |
| denovo23  | gb AY284683.1  | 90,89      | phylum: Nematoda | class: Chromadorea    | Teratocephalus terrestris     |
| denovo69  | gb JN968231.1  | 93,99      | phylum: Nematoda | class: Chromadorea    | Theristus sp.                 |
| denovo89  | gb JN968231.1  | 97,14      | phylum: Nematoda | class: Chromadorea    | Theristus sp.                 |
| denovo128 | gb JN968231.1  | 95,56      | phylum: Nematoda | class: Chromadorea    | Theristus sp.                 |
| denovo129 | gb AY763130.1  | 96,89      | phylum: Nematoda | environmental samples | Uncultured nematode           |
| denovo115 | gb AY854198.1  | 97,62      | phylum: Nematoda | class: Enoplea        | Viscosia viscosa              |
| denovo100 | gb AY854198.1  | 94,97      | phylum: Nematoda | class: Enoplea        | Viscosia viscosa              |
| denovo9   | gb KC920423.1  | 93,97      | phylum: Nematoda | class: Chromadorea    | Zygonemella striata           |
| denovo272 | gb KC920423.1  | 90,62      | phylum: Nematoda | class: Chromadorea    | Zygonemella striata           |

**Supplementary Table S1.2-** Closest BLAST matches of Operational Taxonomic Units (OTUs) retrieved from Rothera sample sites, assigned to Arthropoda, Annelida and Mollusca up to genus or species levels (Description) using SILVA 1.11 database. Depicted are the public accession numbers (AcNumber), BLAST identity percentage against SILVA (BLAST % ID), Phylum and other Taxa ranking

| OTU#      | AcNumber       | BLAST % ID | Phylum             | Taxa Rank                | Description                     |
|-----------|----------------|------------|--------------------|--------------------------|---------------------------------|
| denovo224 | dbj AB076626.1 | 99,74      | phylum: Arthropoda | superfamily: Cytheroidea | Howeina sp.                     |
| denovo64  | dbj AB076628.1 | 95,61      | phylum: Arthropoda | superfamily: Cytheroidea | Cytheropteron subuchioi         |
| denovo295 | dbj AB076628.1 | 96,38      | phylum: Arthropoda | superfamily: Cytheroidea | Cytheropteron subuchioi         |
| denovo36  | dbj AB076644.1 | 98,71      | phylum: Arthropoda | superfamily: Cytheroidea | Robustaurilla salebroza         |
| denovo200 | gb DQ538499.1  | 94,78      | phylum: Arthropoda | order: Siphonostomatoida | Kroyeria sp.                    |
| denovo322 | gb DQ538499.1  | 93,77      | phylum: Arthropoda | order: Siphonostomatoida | Kroyeria sp.                    |
| denovo238 | gb EU380295.1  | 99,22      | phylum: Arthropoda | order: Harpacticoida     | Dactylopusia sp.                |
| denovo326 | gb AY627016.1  | 96,08      | phylum: Arthropoda | order: Harpacticoida     | Bradya sp.                      |
| denovo297 | gb EU380302.1  | 93,83      | phylum: Arthropoda | order: Harpacticoida     | Parastenhelia sp.               |
| denovo103 | gb EU380309.1  | 96,87      | phylum: Arthropoda | order: Harpacticoida     | Itunella muelleri               |
| denovo257 | gb AY627016.1  | 97,39      | phylum: Arthropoda | order: Harpacticoida     | Bradya sp.                      |
| denovo53  | gb KC815328.1  | 96,86      | phylum: Arthropoda | order: Harpacticoida     | Amphiascoides atopus            |
| denovo162 | gb AY627015.1  | 93,23      | phylum: Arthropoda | order: Harpacticoida     | Bryocampus pygmaeus             |
| denovo334 | gb AY627016.1  | 98,44      | phylum: Arthropoda | order: Harpacticoida     | Bradya sp.                      |
| denovo233 | gb EU380309.1  | 95,3       | phylum: Arthropoda | order: Harpacticoida     | Itunella muelleri               |
| denovo105 | gb AY627016.1  | 97,13      | phylum: Arthropoda | order: Harpacticoida     | Bradya sp.                      |
| denovo201 | gb EU380309.1  | 97,65      | phylum: Arthropoda | order: Harpacticoida     | Itunella muelleri               |
| denovo303 | gb EU380306.1  | 98,17      | phylum: Arthropoda | order: Harpacticoida     | Argestigens sp.                 |
| denovo163 | gb EU380285.1  | 98,69      | phylum: Arthropoda | order: Harpacticoida     | Harpacticus sp.                 |
| denovo172 | gb AY692343.1  | 96,86      | phylum: Arthropoda | order: Harpacticoida     | Tisbe furcata                   |
| denovo273 | gb EU380309.1  | 95,05      | phylum: Arthropoda | order: Harpacticoida     | Itunella muelleri               |
| denovo338 | gb EU380309.1  | 95,06      | phylum: Arthropoda | order: Harpacticoida     | Itunella muelleri               |
| denovo176 | gb EU380309.1  | 93,01      | phylum: Arthropoda | order: Harpacticoida     | Itunella muelleri               |
| denovo265 | gb KC815328.1  | 97,38      | phylum: Arthropoda | order: Harpacticoida     | Amphiascoides atopus            |
| denovo210 | gb AY627016.1  | 96,43      | phylum: Arthropoda | order: Harpacticoida     | Bradya sp.                      |
| denovo144 | gb EU380309.1  | 95,83      | phylum: Arthropoda | order: Harpacticoida     | Itunella muelleri               |
| denovo228 | gb EU380306.1  | 97,38      | phylum: Arthropoda | order: Harpacticoida     | Argestigens sp.                 |
| denovo119 | gb EU380300.1  | 95,05      | phylum: Arthropoda | order: Harpacticoida     | Paramenophia sp.                |
| denovo234 | gb EU380309.1  | 96,87      | phylum: Arthropoda | order: Harpacticoida     | Itunella muelleri               |
| denovo332 | gb EU380297.1  | 95,4       | phylum: Arthropoda | order: Harpacticoida     | Diarthodes sp.                  |
| denovo324 | gb EU380309.1  | 97,14      | phylum: Arthropoda | order: Harpacticoida     | Itunella muelleri               |
| denovo1   | gb EU380309.1  | 93,75      | phylum: Arthropoda | order: Harpacticoida     | Itunella muelleri               |
| denovo11  | gb EU380309.1  | 94,27      | phylum: Arthropoda | order: Harpacticoida     | Itunella muelleri               |
| denovo132 | gb EU380309.1  | 93,99      | phylum: Arthropoda | order: Harpacticoida     | Itunella muelleri               |
| denovo12  | gb EU380303.1  | 98,69      | phylum: Arthropoda | order: Harpacticoida     | Ameira scotti                   |
| denovo77  | gb EU380299.1  | 96,08      | phylum: Arthropoda | order: Harpacticoida     | Sewellia tropica                |
| denovo121 | gb EU380306.1  | 96,82      | phylum: Arthropoda | order: Harpacticoida     | Argestigens sp.                 |
| denovo135 | gb EU380295.1  | 95,04      | phylum: Arthropoda | order: Harpacticoida     | Dactylopusia sp.                |
| denovo190 | gb EU380309.1  | 96,72      | phylum: Arthropoda | order: Harpacticoida     | Itunella muelleri               |
| denovo212 | gb EU380309.1  | 94,26      | phylum: Arthropoda | order: Harpacticoida     | Itunella muelleri               |
| denovo226 | gb EU380309.1  | 92,72      | phylum: Arthropoda | order: Harpacticoida     | Itunella muelleri               |
| denovo229 | gb EU380295.1  | 95,34      | phylum: Arthropoda | order: Harpacticoida     | Dactylopusia sp.                |
| denovo291 | gb EU380295.1  | 95,48      | phylum: Arthropoda | order: Harpacticoida     | Dactylopusia sp.                |
| denovo305 | gb EU380297.1  | 95,09      | phylum: Arthropoda | order: Harpacticoida     | Diarthodes sp.                  |
| denovo307 | gb EU380309.1  | 95,6       | phylum: Arthropoda | order: Harpacticoida     | Itunella muelleri               |
| denovo280 | gb AY118078.2  | 100        | phylum: Arthropoda | order: Calanoida         | Ctenocalanus citer              |
| denovo99  | gb FJ372639.1  | 93,75      | phylum: Arthropoda | infraclass: Paraneoptera | Saldula sp.                     |
| denovo2   | emb AJ238061.1 | 100        | phylum: Arthropoda | genus: Artemia           | Artemia franciscana             |
| denovo283 | gb JQ000095.1  | 99,22      | phylum: Arthropoda | family: Glycyphagidae    | Marsupialichus brasiliensis     |
| denovo179 | gb GU902153.1  | 100        | phylum: Annelida   | Clitellata               | Grania sp.                      |
| denovo206 | gb AF411887.1  | 99,74      | phylum: Annelida   | Clitellata               | Heronidrilus gravidus           |
| denovo157 | gb JN936459.1  | 99,23      | phylum: Annelida   | class: Polychaeta        | Tharyx sp.                      |
| denovo309 | gb AF448150.1  | 98,73      | phylum: Annelida   | class: Polychaeta        | Apistobranchnus typicus         |
| denovo6   | gb JN852836.1  | 100        | phylum: Annelida   | class: Polychaeta        | Neopolynoe paradoxa             |
| denovo329 | gb GU179368.1  | 100        | phylum: Annelida   | class: Polychaeta        | Aglaophamus trissophyllus       |
| denovo158 | gb EU418858.1  | 98,74      | phylum: Annelida   | class: Polychaeta        | Polycirrus sp.                  |
| denovo331 | gb JF509728.1  | 96,34      | phylum: Annelida   | class: Polychaeta        | Capitella teleta                |
| denovo182 | gb AY525627.1  | 94,85      | phylum: Annelida   | class: Polychaeta        | Eulalia viridis                 |
| denovo192 | gb AF508126.1  | 96,15      | phylum: Annelida   | class: Polychaeta        | Scoloplos johnstonei            |
| denovo104 | gb DQ153064.1  | 99,74      | phylum: Annelida   | class: Polychaeta        | Polygordius jouinae             |
| denovo259 | gb AY532362.1  | 92,33      | phylum: Annelida   | class: Polychaeta        | Phylo michaelsoni               |
| denovo145 | gb KF511823.1  | 99,74      | phylum: Annelida   | class: Polychaeta        | Ophelina sp.                    |
| denovo73  | gb KC984696.1  | 100        | phylum: Mollusca   | class: Bivalvia          | Yoldia eightsi                  |
| denovo127 | gb KC429382.1  | 100        | phylum: Mollusca   | class: Bivalvia          | Cyamiomacra laminifera          |
| denovo164 | gb JQ611498.1  | 100        | phylum: Mollusca   | class: Bivalvia          | Pecten jacobaeus                |
| denovo111 | dbj AB714767.1 | 97,69      | phylum: Mollusca   | class: Bivalvia          | Nipponomontacuta actinariophila |
| denovo312 | gb KC429372.1  | 99,74      | phylum: Mollusca   | class: Bivalvia          | Mysella charcoti                |
| denovo56  | gb KC429331.1  | 100        | phylum: Mollusca   | class: Bivalvia          | Mytilus edulis                  |
| denovo40  | gb KC984695.1  | 95,66      | phylum: Mollusca   | class: Bivalvia          | Neilonella whoii                |
| denovo221 | gb KC429382.1  | 97,49      | phylum: Mollusca   | class: Bivalvia          | Cyamiomacra laminifera          |

**Supplementary Table S1.3-** Closest BLAST matches of Operational Taxonomic Units (OTUs) retrieved from Rothera sample sites, assigned to Platyhelminthes, up to genus or species levels (Description) using SILVA 1.11 database. Depicted are the public accession numbers (AcNumber), BLAST identity percentage against SILVA (BLAST % ID), Phylum and other Taxa ranking.

| OTU#      | AcNumber          | BLAST % ID | Phylum                  | Taxa Rank                 | Description                 |
|-----------|-------------------|------------|-------------------------|---------------------------|-----------------------------|
| denovo47  | emb AJ012531.1    | 95,84      | phylum: Platyhelminthes | order: Macrostomida       | Paromalostomum fuscum       |
| denovo230 | emb AJ012531.1    | 93,54      | phylum: Platyhelminthes | order: Macrostomida       | Paromalostomum fuscum       |
| denovo34  | emb AJ012531.1    | 93,75      | phylum: Platyhelminthes | order: Macrostomida       | Paromalostomum fuscum       |
| denovo74  | emb AJ012531.1    | 93,51      | phylum: Platyhelminthes | order: Macrostomida       | Paromalostomum fuscum       |
| denovo262 | emb AJ012531.1    | 92,45      | phylum: Platyhelminthes | order: Macrostomida       | Paromalostomum fuscum       |
| denovo260 | emb AJ012531.1    | 93,51      | phylum: Platyhelminthes | order: Macrostomida       | Paromalostomum fuscum       |
| denovo14  | gb KC869790.1     | 94,59      | phylum: Platyhelminthes | order: Macrostomida       | Macrostomum sp.             |
| denovo79  | emb AJ012531.1    | 92,99      | phylum: Platyhelminthes | order: Macrostomida       | Paromalostomum fuscum       |
| denovo94  | emb AJ012531.1    | 93,77      | phylum: Platyhelminthes | order: Macrostomida       | Paromalostomum fuscum       |
| denovo175 | emb AJ012531.1    | 94,06      | phylum: Platyhelminthes | order: Macrostomida       | Paromalostomum fuscum       |
| denovo243 | emb AJ012531.1    | 93,01      | phylum: Platyhelminthes | order: Macrostomida       | Paromalostomum fuscum       |
| denovo218 | gb KC529506.1     | 96,13      | phylum: Platyhelminthes | suborder: Dalyellioida    | Pogaina sp.                 |
| denovo50  | gb KC602396.1     | 94,85      | phylum: Platyhelminthes | suborder: Kalyptorhynchia | Acrorhynchides robustus     |
| denovo67  | gb KJ887470.1     | 95,03      | phylum: Platyhelminthes | suborder: Kalyptorhynchia | Uncinorhynchus flavidus v   |
| denovo33  | gb KC529411.1     | 96,34      | phylum: Platyhelminthes | suborder: Neodalyelliida  | Proxenetes puccinellicola   |
| denovo16  | gb KC529435.1     | 93,93      | phylum: Platyhelminthes | suborder: Neodalyelliida  | Byrsophleps delamarei       |
| denovo186 | gb AY775738.1     | 97,91      | phylum: Platyhelminthes | suborder: Kalyptorhynchia | Stradorhynchus sp.          |
| denovo203 | gb AY775741.1     | 94,04      | phylum: Platyhelminthes | suborder: Kalyptorhynchia | Mesorhynchus terminostylus  |
| denovo340 | gb KJ887440.1     | 98,95      | phylum: Platyhelminthes | suborder: Kalyptorhynchia | Odontorhynchus aculeatus    |
| denovo7   | gb KJ887470.1     | 97,9       | phylum: Platyhelminthes | suborder: Kalyptorhynchia | Uncinorhynchus flavidus     |
| denovo17  | emb AJ012507.1    | 91,67      | phylum: Platyhelminthes | suborder: Kalyptorhynchia | Cheliplana cf. orthocirra   |
| denovo61  | gb KJ887445.1     | 94,52      | phylum: Platyhelminthes | suborder: Kalyptorhynchia | Opisthocystis goettei       |
| denovo282 | gb KC529506.1     | 94,07      | phylum: Platyhelminthes | suborder: Dalyellioida    | Pogaina sp. 3               |
| denovo98  | gb KC529523.1     | 95,63      | phylum: Platyhelminthes | suborder: Dalyellioida    | Dalyellioida sp.            |
| denovo279 | gb GU936108.1     | 93,19      | phylum: Platyhelminthes | suborder: Kalyptorhynchia | Schizorhynchidae sp.        |
| denovo239 | gb KJ887448.1     | 94,79      | phylum: Platyhelminthes | suborder: Kalyptorhynchia | Thylacorhynchus conglobatus |
| denovo320 | gb KC602396.1     | 93,56      | phylum: Platyhelminthes | suborder: Kalyptorhynchia | Acrorhynchides robustus     |
| denovo41  | gb KC602396.1     | 93,04      | phylum: Platyhelminthes | suborder: Kalyptorhynchia | Acrorhynchides robustus     |
| denovo63  | gb AY775746.1     | 100        | phylum: Platyhelminthes | suborder: Kalyptorhynchia | Schizochilus choriurus      |
| denovo107 | gb KC529518.1     | 93,79      | phylum: Platyhelminthes | suborder: Dalyellioida    | Wahlia macrostyliifera      |
| denovo146 | gb KC529521.1     | 92,98      | phylum: Platyhelminthes | suborder: Typhloplanoida  | Austradenopharynx sp.       |
| denovo185 | gb KC529506.1     | 96,66      | phylum: Platyhelminthes | suborder: Dalyellioida    | Pogaina sp.                 |
| denovo271 | gb KC869833.1     | 92,54      | phylum: Platyhelminthes | suborder: Dalyellioida    | Baicalellia canadensis      |
| denovo290 | gb KC869833.1     | 96,39      | phylum: Platyhelminthes | suborder: Dalyellioida    | Baicalellia canadensis      |
| denovo313 | gb U70077.1 ARU70 | 92,23      | phylum: Platyhelminthes | order: Proseriata         | Archiloa rivularis          |
| denovo268 | gb AY775733.1     | 99,74      | phylum: Platyhelminthes | order: Proseriata         | Cirrifera sopotthelersae    |
| denovo199 | gb AY222124.1     | 94,72      | phylum: Platyhelminthes | order: Plagiorchiida      | Enenterum aureum            |

**Supplementary Table S2:** Overview of the Antarctic sampled sites *in silico* statistics for the NGS of 18S rRNA gene region used. Each replicated sampled site had a 8 nucleotide multiplex-identification tag (MID), depth in meters (m), abbreviated description of the sample, post-quality control and chimera checked number of reads and total number of OTUs at the 97% threshold.

| Location        | MIDTag   | Depth (m) | Description | No Reads | QC/ Chimera check reads | Total OTUs |
|-----------------|----------|-----------|-------------|----------|-------------------------|------------|
| Hangar_1        | TCGTCTAC | 18        | HC.1        | 1224     | 970                     | 49         |
| Hangar_2        | AGACAGAC | 18        | HC.2        | 13007    | 10399                   | 104        |
| Hangar_3        | CTGTTCAC | 18        | HC.3        | 4160     | 3076                    | 117        |
| Rothera Point_1 | AGTCAGAG | 15        | RP.1        | 402      | 341                     | 37         |
| Rothera Point_2 | TCAGCTCT | 15        | RP.2        | 478      | 376                     | 30         |
| Rothera Point3  | ACTCAGAC | 15        | RP.3        | 7230     | 6181                    | 79         |
| Islands_1       | CTAGTCCT | 13        | I.1         | 19716    | 16730                   | 157        |
| Islands_2       | CAGTTGAC | 13        | I.2         | 549      | 455                     | 54         |
| Islands_3       | TAGGTTGC | 13        | I.3         | 3617     | 2924                    | 50         |
| South cove_1    | TCTGCTCA | 8         | SC.1        | 424      | 337                     | 21         |
| South cove_2    | ATCGTAGC | 8         | SC.2        | 4767     | 4034                    | 51         |
| South cove_3    | CATGTGCA | 8         | SC.3        | 549      | 3832                    | 69         |
